# Supplementary figures and images for: Integrated bioprinting and imaging for scalable, networkable desktop experimentation
Source: Royal Society of Chemistry journal article supplement (doi:10.1039/c4ra05932h), 2014-01-01

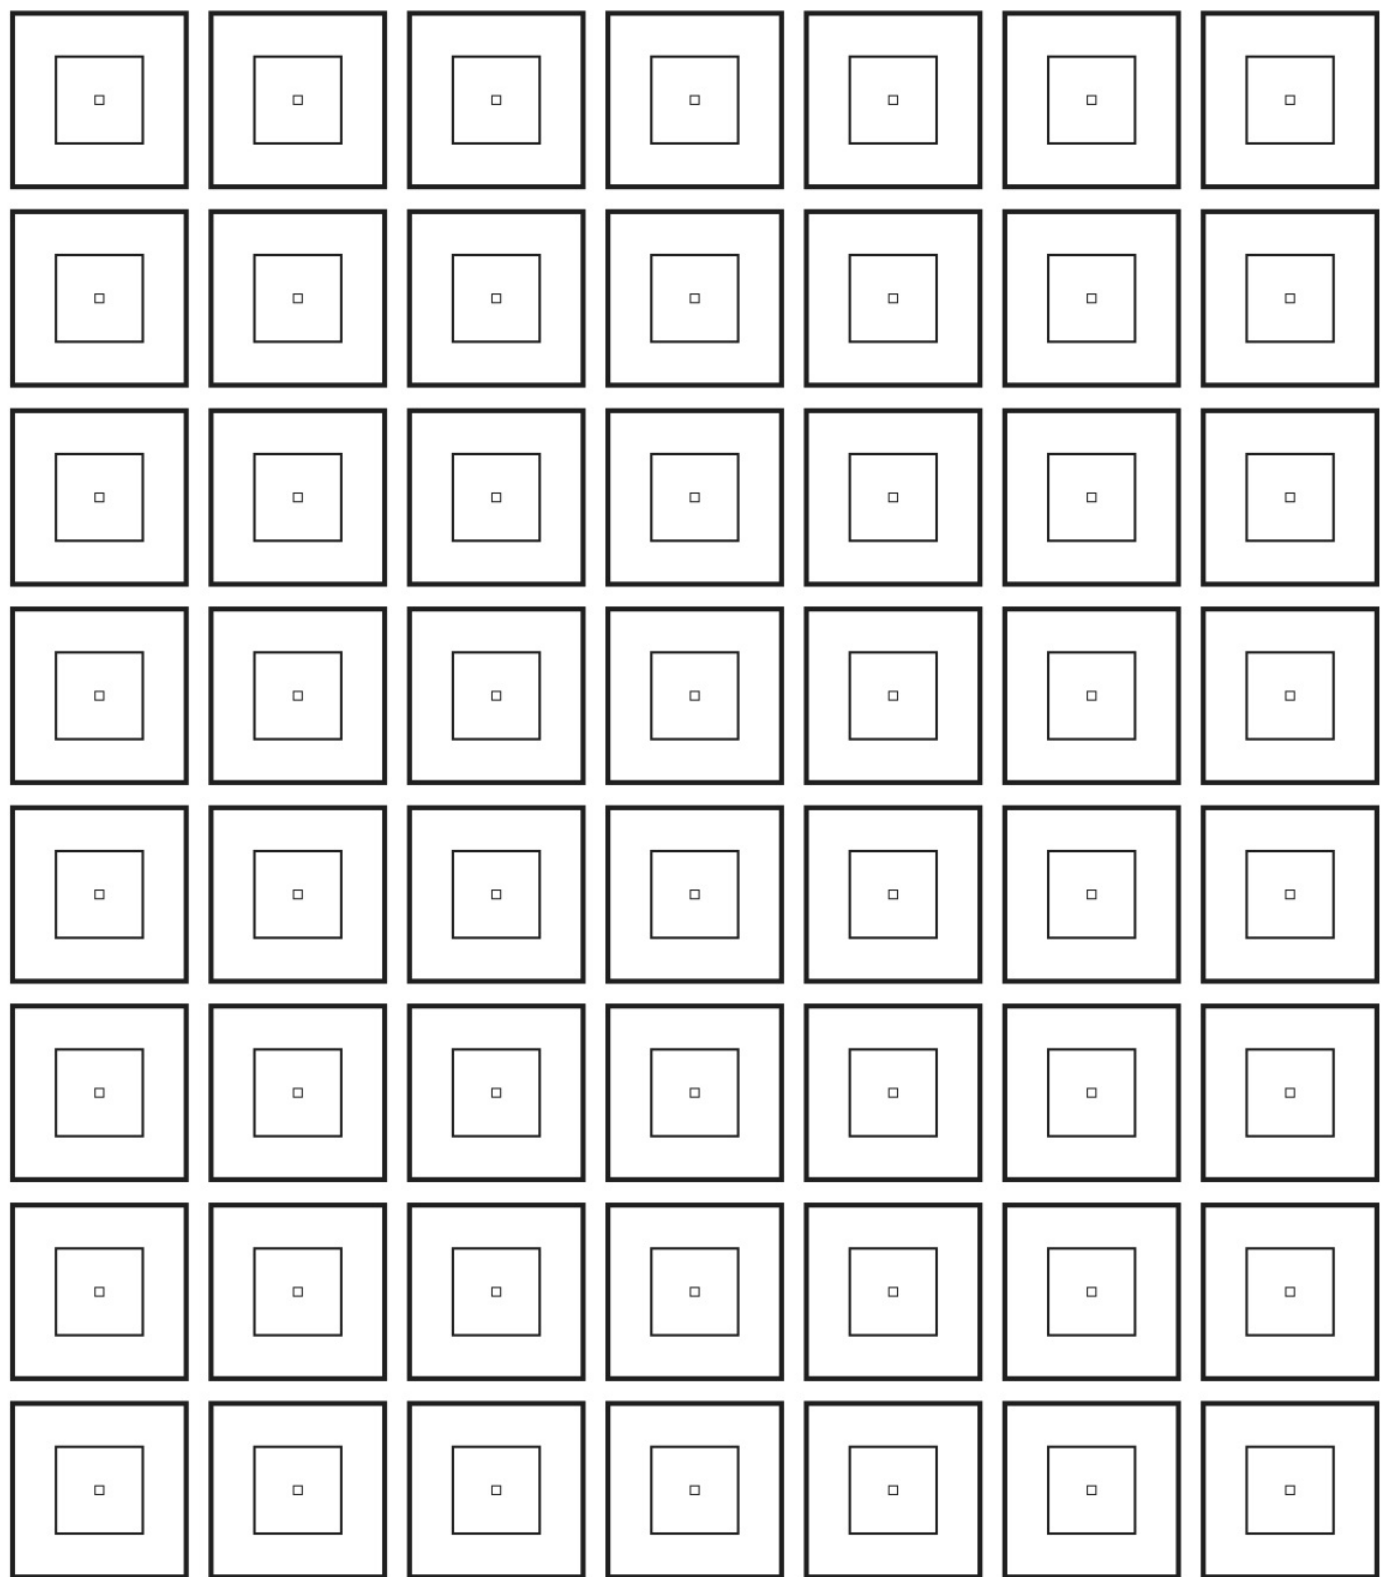

Supplement: c4ra05932h5.pdf [file c4ra05932h5.pdf]
